# Supplementary material
Source: PubMed Central journal article supplement (PMC7147814)
Supplement: NIHMS1571463-supplement-Supp_TableS1-6.pdf [file NIHMS1571463-supplement-Supp_TableS1-6.pdf]

**Supplementary Table 1:** Table showing the primer information used in this study

| <b>Gene Name</b>         | <b>Primer Sequence</b>                                     | <b>Product Length (bp)</b> | <b>Accession Number</b> |
|--------------------------|------------------------------------------------------------|----------------------------|-------------------------|
| <i>Gapdh</i>             | F- GCCGATGCCCCATGTTTGTGA<br>R-GGGTGGCAGTGATGGCATGGAC       | 178                        | NM_008084               |
| <i>Pdgfra</i>            | F-ATGACAGCAGGCAGGGCTTCAACG<br>R-CGGCACAGGTCACCACGATCGTTT   | 195                        | NM_011058               |
| <i>Myh11</i><br>(smMHC)  | F-CAGCTGGAAGAGGCAGAGGAGG<br>R-AACAAATGAAGCCTCGTTTCCTCTC    | 198                        | NM_013607               |
| <i>c-kit</i>             | F- CGCCTGCCGAAATGTATGACG<br>R- GGTTCTCTGGGTTGGGGTTGC       | 162                        | NM_021099.2             |
| <i>Uchl1</i><br>(PGP9.5) | F-CGATGGAGATTAACCCCGAGATG<br>R-TTTTCATGCTGGGCCGTGAG        | 169                        | NM_011670               |
| <i>Kcnn3</i><br>(SK3)    | F- CTGCTGGTGTTCAGCATCTCTCTG<br>R- GTCCCATAGCCAATGGAAAGGAAC | 150                        | NM_080466.1             |
| <i>P2ry1</i>             | F-ACCGAGGTGCCTTGGTCGGT<br>R-CCGGTCTTGGTCAGGGCACA           | 140                        | NM_008772               |
| <i>Adra1a</i>            | F-GCCCATGGGGTCCTTCTTCCCG<br>R-ACTCCTGGCTGGAGCATGGG         | 122                        | NM_013461               |
| <i>Adra1b</i>            | F-AGTGCTCGGCTACTGGGTGC<br>R-TGACCAGCGTGGGGTACTGC           | 155                        | NM_007416               |
| <i>Adra1d</i>            | F-CGTCCTGCCTCTGGGTTCTCT<br>R-AGCAGGGGTAGATGAGCGGGT         | 116                        | NM_013460               |

**Supplementary Table 2:** Tables summarizing means  $\pm$  SE of 4 parameters of spontaneous contractions of circular muscle layers of mouse distal colon for 5 minutes after adding phenylephrine 10 nM-10  $\mu$ M to organ baths.

|                      | AUC (mN·min)          |                   |                   |                   |
|----------------------|-----------------------|-------------------|-------------------|-------------------|
|                      | 10 nM                 | 100 nM            | 1 $\mu$ M         | 10 $\mu$ M        |
| WT (5)*              | 38.30 $\pm$ 3.52      | 36.33 $\pm$ 3.45  | 30.93 $\pm$ 2.95  | 24.92 $\pm$ 3.60  |
| WT+RS (6)            | 81.50 $\pm$ 11.47     | 79.22 $\pm$ 11.37 | 77.44 $\pm$ 11.30 | 71.36 $\pm$ 10.92 |
| WT+Apa (5)           | 85.13 $\pm$ 13.88     | 84.47 $\pm$ 13.38 | 80.83 $\pm$ 13.32 | 74.73 $\pm$ 11.44 |
| <i>Adra1a</i> KO (6) | 59.75 $\pm$ 3.84      | 58.56 $\pm$ 3.91  | 56.64 $\pm$ 4.01  | 50.67 $\pm$ 3.83  |
|                      | Amplitude (mN)        |                   |                   |                   |
|                      | 10 nM                 | 100 nM            | 1 $\mu$ M         | 10 $\mu$ M        |
| WT (5)*              | 10.24 $\pm$ 1.66      | 8.88 $\pm$ 1.74   | 5.44 $\pm$ 2.00   | 1.05 $\pm$ 0.36   |
| WT+RS (6)            | 15.50 $\pm$ 0.89      | 15.40 $\pm$ 0.99  | 15.30 $\pm$ 1.29  | 12.66 $\pm$ 1.06  |
| WT+Apa (5)           | 14.53 $\pm$ 2.59      | 14.30 $\pm$ 2.58  | 12.50 $\pm$ 2.37  | 10.12 $\pm$ 2.33  |
| <i>Adra1a</i> KO (6) | 12.86 $\pm$ 1.75      | 12.34 $\pm$ 1.61  | 11.93 $\pm$ 1.62  | 8.79 $\pm$ 1.66   |
|                      | Tone (mN)             |                   |                   |                   |
|                      | 10 nM                 | 100 nM            | 1 $\mu$ M         | 10 $\mu$ M        |
| WT (5)*              | 4.81 $\pm$ 0.75       | 4.64 $\pm$ 0.76   | 4.59 $\pm$ 0.79   | 4.50 $\pm$ 0.72   |
| WT+RS (6)            | 9.77 $\pm$ 2.22       | 9.61 $\pm$ 2.17   | 9.38 $\pm$ 2.19   | 9.40 $\pm$ 2.13   |
| WT+Apa (5)           | 10.63 $\pm$ 2.23      | 10.70 $\pm$ 2.31  | 10.92 $\pm$ 2.18  | 11.02 $\pm$ 2.44  |
| <i>Adra1a</i> KO (6) | 6.80 $\pm$ 0.60       | 6.81 $\pm$ 0.62   | 6.71 $\pm$ 0.60   | 6.72 $\pm$ 0.63   |
|                      | Frequency (cont./min) |                   |                   |                   |
|                      | 10 nM                 | 100 nM            | 1 $\mu$ M         | 10 $\mu$ M        |
| WT (5)*              | 2.44 $\pm$ 0.39       | 2.36 $\pm$ 0.36   | 2.24 $\pm$ 0.33   | 1.84 $\pm$ 0.27   |
| WT+RS (6)            | 2.57 $\pm$ 0.20       | 2.57 $\pm$ 0.20   | 2.50 $\pm$ 0.20   | 2.53 $\pm$ 0.19   |
| WT+Apa (5)           | 3.04 $\pm$ 0.37       | 2.88 $\pm$ 0.31   | 2.96 $\pm$ 0.35   | 3.08 $\pm$ 0.33   |
| <i>Adra1a</i> KO (6) | 2.43 $\pm$ 0.06       | 2.40 $\pm$ 0.05   | 2.37 $\pm$ 0.03   | 2.43 $\pm$ 0.12   |

Note: AUC: area under the curve; WT: wild type; RS: RS100329; Apa: apamin; KO: Knock out. \*Numbers in ( ) represent number of mice in each of protocols.

**Supplementary Table 3:** Table summarizing means  $\pm$  SE of  $\Delta$ AUC by SNS in each condition.

|                                                | $\Delta$ AUC (mN•min) by SNS |
|------------------------------------------------|------------------------------|
| ALMH (23)* in WT                               | -0.47 $\pm$ 0.05             |
| ALMH + RS (7) in WT                            | -0.68 $\pm$ 0.10             |
| ALMH + Pro (6) in WT                           | -0.49 $\pm$ 0.10             |
| ALMH + Yoh (5) in WT                           | -0.51 $\pm$ 0.04             |
| ALMH + RS + Pro (10) in WT                     | 0.052 $\pm$ 0.047            |
| ALMH + Apa + Pro (5) in WT                     | 0.27 $\pm$ 0.15              |
| ALMH (5) in <i>Adra1a</i> <sup>-/-</sup>       | -0.29 $\pm$ 0.11             |
| ALMH + Pro (5) in <i>Adra1a</i> <sup>-/-</sup> | 0.16 $\pm$ 0.08              |
| ALMH + Pro + Sp (6) in WT                      | -0.61 $\pm$ 0.14             |
| ALMH + Pro + Sp + 18 $\beta$ -Gly (6) in WT    | 0.0074 $\pm$ 0.014           |

Note: SNS: sympathetic nerve stimulation; WT: wild type; ALMH: atropine 1  $\mu$ M + L-NNA 100  $\mu$ M + MRS2500 1  $\mu$ M + hexamethonium 100  $\mu$ M; RS: RS100329 100nM; Pro: propranolol 10  $\mu$ M; Yoh:  $\alpha$ -yohimbine 1  $\mu$ M; Apa: apamin 300nM; Sp: substance P \*Numbers in ( ) represent number of mice in each of protocols.

**Supplementary Table 4:** Table summarizing means  $\pm$  SE of  $\Delta V$  by SNS in each condition.

|                       | $\Delta V$ (mV) by SNS |
|-----------------------|------------------------|
| ALMH (12)*            | -19.24 $\pm$ 0.58      |
| ALMH + Praz (6)       | -9.31 $\pm$ 0.75       |
| ALMH + Apa (6)        | -9.61 $\pm$ 1.03       |
| ALMH + Praz + Pro (6) | -0.01 $\pm$ 0.19       |
| ALMH + Apa + Pro (6)  | -0.018 $\pm$ 0.082     |

Note: SNS: sympathetic nerve stimulation; ALMH: atropine 1  $\mu$ M + L-NNA 100  $\mu$ M + MRS2500 1  $\mu$ M + hexamethonium 100  $\mu$ M; Praz: prazosin 1  $\mu$ M; Apa: apamin 300nM; Pro: propranolol 10  $\mu$ M \*Numbers in ( ) represent number of mice in each of protocols.

**Supplementary Table 5:** Table summarizing means  $\pm$  SE of amplitude of induced CMMC in each condition.

|                              | Amplitude (mN)   |                  |                  |
|------------------------------|------------------|------------------|------------------|
|                              | Proximal         | Mid              | Distal           |
| Control without SNS 2Hz (5)* | 17.58 $\pm$ 3.51 | 29.42 $\pm$ 2.03 | 28.86 $\pm$ 6.27 |
| Control with SNS 2Hz (5)     | 16.54 $\pm$ 1.96 | 1.06 $\pm$ 0.34  | 1.90 $\pm$ 0.66  |
| RS without SNS 2Hz(5)        | 15.42 $\pm$ 1.74 | 21.48 $\pm$ 3.19 | 9.80 $\pm$ 2.62  |
| RS with SNS 2Hz(5)           | 17.22 $\pm$ 1.44 | 17.39 $\pm$ 3.79 | 7.88 $\pm$ 1.93  |

Note: SNS: sympathetic nerve stimulation; RS: RS100329; \*Numbers in ( ) represent number of mice in each of protocols.

**Supplementary Table 6:** Table summarizing means  $\pm$  SE of amplitude of spontaneous CMMC in each condition.

|                                      | Amplitude (mN)   |                  |                  |
|--------------------------------------|------------------|------------------|------------------|
|                                      | Proximal         | Mid              | Distal           |
| WT without SNS 2Hz (9)*              | 20.01 $\pm$ 2.35 | 22.94 $\pm$ 3.71 | 29.13 $\pm$ 6.39 |
| WT with SNS 2Hz (9)                  | 16.71 $\pm$ 1.73 | 2.26 $\pm$ 0.83  | 2.42 $\pm$ 0.53  |
| <i>Adra1a</i> KO without SNS 2Hz (8) | 21.26 $\pm$ 2.22 | 23.54 $\pm$ 4.46 | 4.56 $\pm$ 0.70  |
| <i>Adra1a</i> KO with SNS 2Hz (8)    | 22.70 $\pm$ 2.54 | 31.08 $\pm$ 5.41 | 4.74 $\pm$ 0.58  |
| WT without SNS 5Hz (10)*             | 18.31 $\pm$ 1.75 | 28.36 $\pm$ 2.84 | 19.68 $\pm$ 3.31 |
| WT with SNS 5Hz (10)*                | 15.40 $\pm$ 1.61 | 2.17 $\pm$ 0.56  | 3.30 $\pm$ 0.92  |
| <i>Adra1a</i> KO without SNS 5Hz(7)  | 21.40 $\pm$ 2.63 | 25.33 $\pm$ 5.22 | 7.81 $\pm$ 1.47  |
| <i>Adra1a</i> KO with SNS 5Hz(7)     | 21.16 $\pm$ 2.75 | 22.16 $\pm$ 3.69 | 5.73 $\pm$ 1.33  |

Note: SNS: sympathetic nerve stimulation; WT: wild type; KO: Knock out. \*Numbers in ( ) represent number of mice in each of protocols.
